# Supplementary material for: How does the multiple constituent affect the carrier generation and charge transport in multicomponent TCOs of In–Zn–Sn oxide
Source: Royal Society of Chemistry journal article supplement (doi:10.1039/c5tc01256b), 2015-01-01
Supplement: c5tc01256b1.pdf [file c5tc01256b1.pdf]

### Supplementary materials

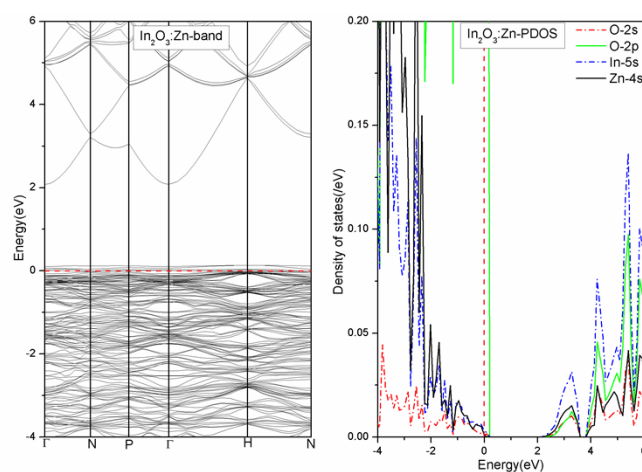

Fig.S1.(a) The bandstructure and (b) PDOS of  $\text{In}_2\text{O}_3:\text{Zn}$ , respectively. The red dashed lines in these plots represent Fermi level.
